# Supplementary material
Source: publisher figshare collection journal article supplement (https://springernature.figshare.com/ndownloader/files/16694549)
Supplement: Supplementary file [file 16694549]

**Additional file 4.** Random walk betweenness centrality of cell types for validation of MCDM in joint tissue. Cell-cell interactions for the validation MCDM were predicted from cell-specific scRNA-seq DEGs by using a publicly available mouse ortholog ligand-receptor pairs database (Methods). Weights were based on the number of cells of each cell type and its number of predicted upstream regulators.

| cell  | rw_score_ligand_receptor |
|-------|--------------------------|
| gran  | 0,834270517              |
| adipo | 0,095489052              |
| myelo | 0,08753179               |
| macro | 0,009663604              |
| treg  | 0,00128887               |
| osteo | 0,001205998              |
